# Supplementary material for: The temporal program of peripheral blood gene expression in the response of nonhuman primates to Ebola hemorrhagic fever
Source: PubMed Central journal article supplement (PMC2375004; doi:10.1186/gb-2007-8-8-r174), 2007-08-28
Supplement: gb-2007-8-8-r174-S1.pdf [file gb-2007-8-8-r174-S1.pdf]

| Day 0  | Day 1 | Day 2  | Day 3  | Day 4 | Day 5  | Day 6  |
|--------|-------|--------|--------|-------|--------|--------|
| 28-221 | 331   | 28-221 | 28-332 | 9108  | 28-221 | 28-332 |
| 28-332 | 717   | 28-332 | 323    | 9878  | 323    | 9878   |
| 323    | 8667  | 323    | 32q    |       | 359    |        |
| 32q    | 9028  | 331    | 359    |       | 48-143 |        |
| 331    | 9093  | 359    | 8667   |       |        |        |
| 359    | 9108  | 48-143 | 9093   |       |        |        |
| 48-143 | 9877  | 8667   | 9108   |       |        |        |
| 717    |       | 9028   |        |       |        |        |
| 8667   |       | 9112   |        |       |        |        |
| 9028   |       | 9878   |        |       |        |        |
| 9093   |       | 9093   |        |       |        |        |
| 9108   |       |        |        |       |        |        |
| 9112   |       |        |        |       |        |        |
| 9877   |       |        |        |       |        |        |
| 9878   |       |        |        |       |        |        |
