# Supplementary material for: The temporal program of peripheral blood gene expression in the response of nonhuman primates to Ebola hemorrhagic fever
Source: PubMed Central journal article supplement (PMC2375004; doi:10.1186/gb-2007-8-8-r174), 2007-08-28
Supplement: gb-2007-8-8-r174-S2.pdf [file gb-2007-8-8-r174-S2.pdf]

|               | Day 0 | Day 1 | Day 2 | Day 3 | Day 4 | Day 5 | Day 6 |
|---------------|-------|-------|-------|-------|-------|-------|-------|
| <b>28-221</b> | x     |       | x     | x     |       | x     |       |
| <b>28-332</b> | x     |       | x     | x     |       |       | x     |
| <b>323</b>    | x     |       | x     | x     |       | x     |       |
| <b>32q</b>    | x     |       |       |       |       |       |       |
| <b>331</b>    | x     | x     | x     | x     |       |       |       |
| <b>359</b>    | x     |       | x     | x     |       | x     |       |
| <b>48-143</b> | x     |       | x     | x     |       | x     |       |
| <b>717</b>    | x     | x     |       |       |       |       |       |
| <b>8667</b>   | x     | x     | x     | x     |       |       |       |
| <b>9028</b>   | x     | x     | x     | x     |       |       |       |
| <b>9093</b>   | x     | x     |       | x     |       |       |       |
| <b>9108</b>   | x     | x     |       |       | x     |       |       |
| <b>9112</b>   | x     |       | x     | x     |       |       |       |
| <b>9877</b>   | x     | x     |       |       |       |       |       |
| <b>9878</b>   | x     |       | x     | x     | x     |       | x     |
