# Supplementary material for: The temporal program of peripheral blood gene expression in the response of nonhuman primates to Ebola hemorrhagic fever
Source: PubMed Central journal article supplement (PMC2375004; doi:10.1186/gb-2007-8-8-r174), 2007-08-28

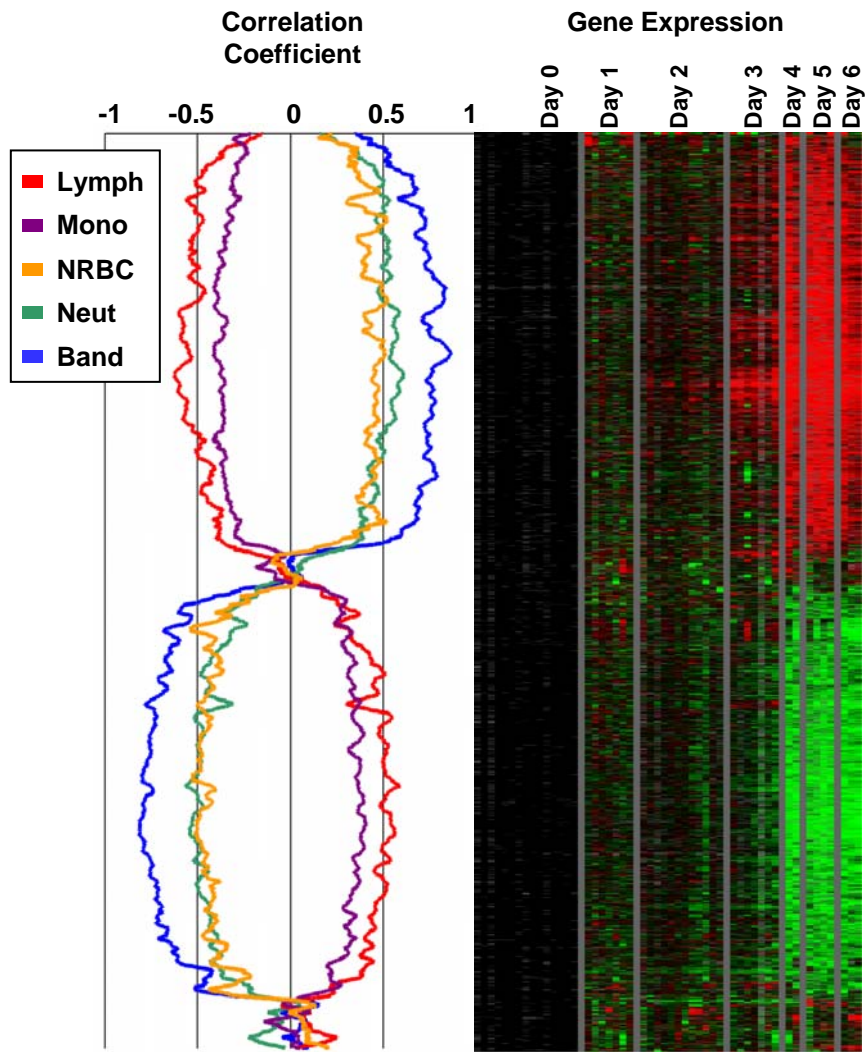

Supplement: gb-2007-8-8-r174-S3.pdf [file gb-2007-8-8-r174-S3.pdf]
